# Supplementary material
Source: PubMed Central journal article supplement (PMC2980391)

**A**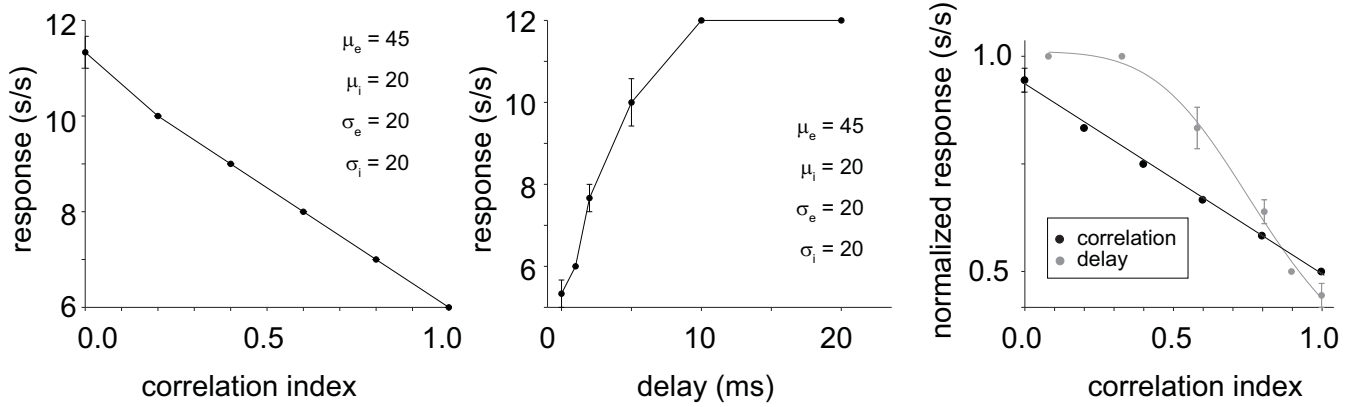**B**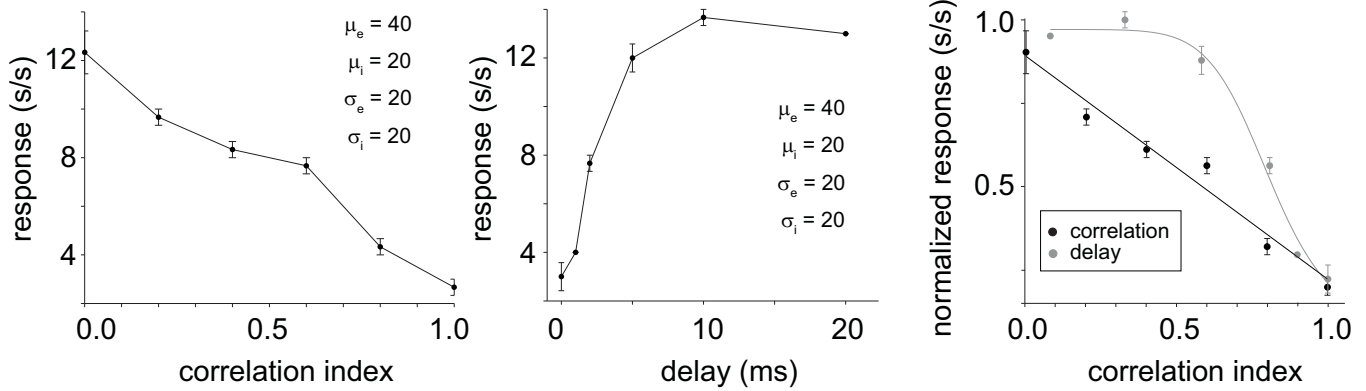

Supplementary Figure 1

Supplement: figS1.pdf [file figS1.pdf]
